# Supplementary material for: Effects of Mn promotion on the structure and catalytic performance of Co2C-based catalysts for the Fischer–Tropsch to olefin reaction
Source: Royal Society of Chemistry journal article supplement (doi:10.1039/d4re00515e), 2024-12-11
Supplement: d4re00515e1.pdf [file d4re00515e1.pdf]

## **Effects of Mn Promotion on the Structure and Catalytic Performance of CoMn catalysts for Fisher-Tropsch to Olefin Reactions**

Xinxing Wang,<sup>a, b</sup> Xuan Zhou,<sup>a, b</sup> Wen Chen,<sup>a</sup> Yunlei An,<sup>a, b</sup> Yuanyuan Dai<sup>c\*</sup> and  
Tiejun Lin<sup>a, b \*</sup>

<sup>a</sup> CAS Key Laboratory of Low-Carbon Conversion Science and Engineering, Shanghai  
Advanced Research Institute, Chinese Academy of Sciences, Shanghai 201203, PR  
China

<sup>b</sup> University of the Chinese Academy of Sciences, Beijing 100049, PR China

<sup>c</sup> Inner Mongolia Erdos Electric Power and Metallurgy Group Co., Ltd., Ordos, Inner  
Mongolia 016064, China

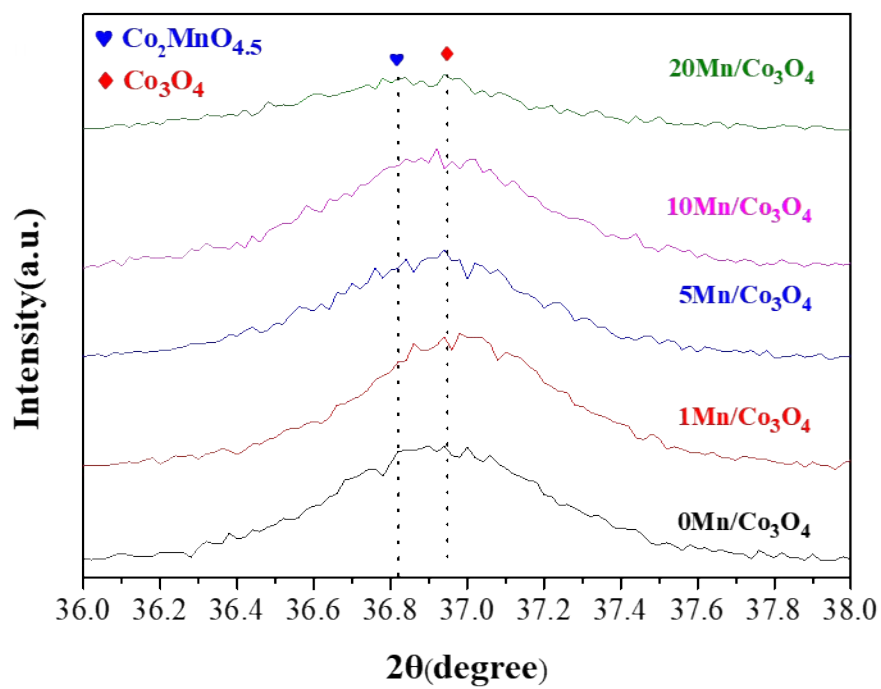

**Figure S1.** XRD patterns of  $x\text{Mn}/\text{Co}_3\text{O}_4$  calcined catalysts

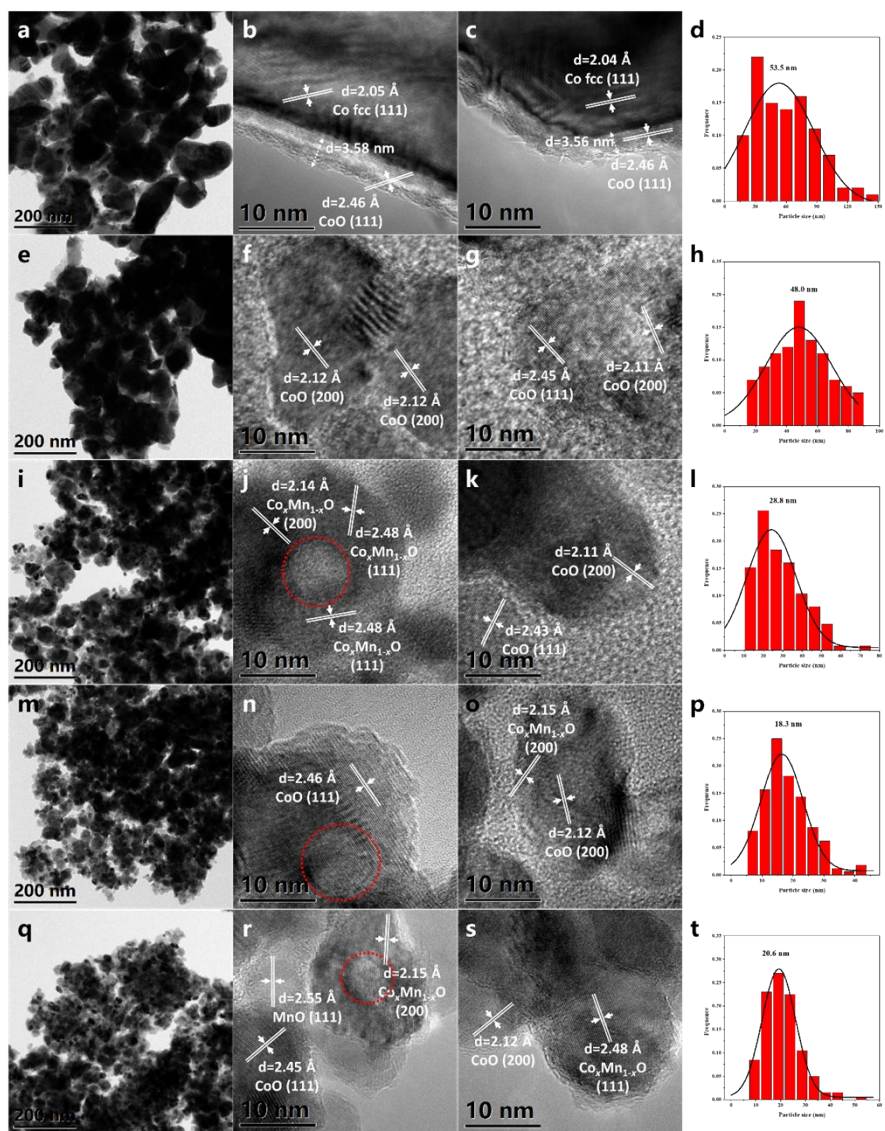

**Figure S2.** TEM images and particle size distributions of the different reduced  $x\text{Mn}/\text{Co}_3\text{O}_4$  catalysts: (a-d) 0Mn/Co<sub>3</sub>O<sub>4</sub>, (e-h) 1Mn/Co<sub>3</sub>O<sub>4</sub>, (i-l) 5Mn/Co<sub>3</sub>O<sub>4</sub>, (m-p) 10Mn/Co<sub>3</sub>O<sub>4</sub>, (q-t) 20Mn/Co<sub>3</sub>O<sub>4</sub>

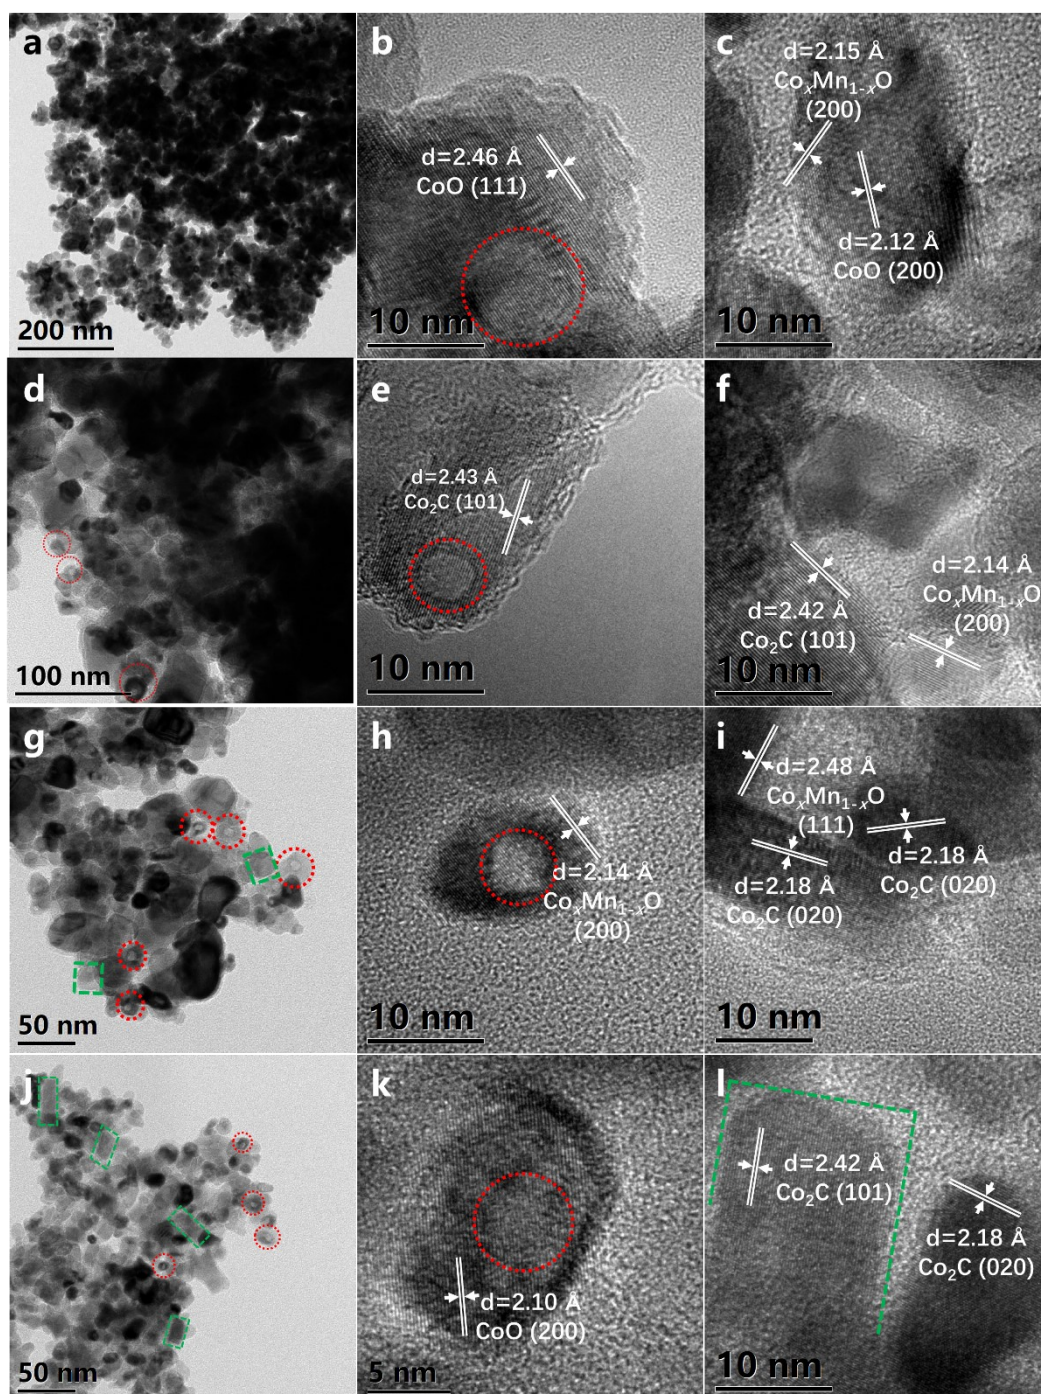

**Figure S3.** TEM images of the different reaction times of 10Mn/Co<sub>3</sub>O<sub>4</sub> catalysts: (a-c) 0 h, (d-f) 5 h, (g-i) 10 h, (j-l) 15 h.



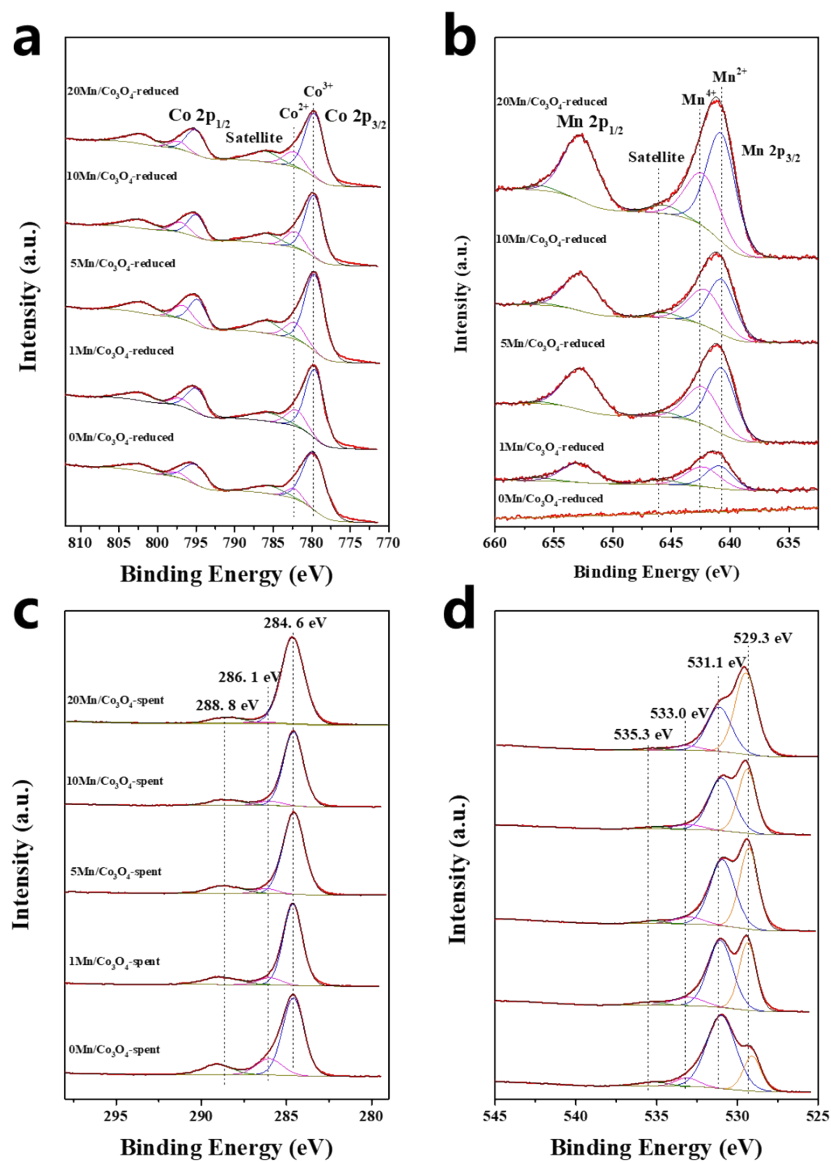

**Figure S4.** XPS spectra of the different reduced  $x\text{Mn}/\text{Co}_3\text{O}_4$  catalysts: (a) Co 2p, (b) Mn 2p, (c) C 1s and (d) O 1s.
